# Supplementary material
Source: publisher figshare collection journal article supplement (https://karger.figshare.com/ndownloader/files/29238606)

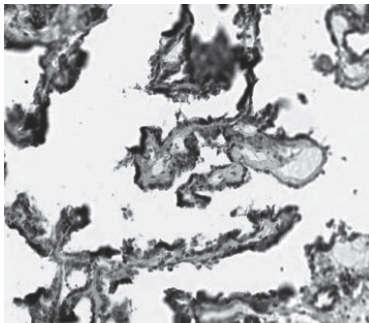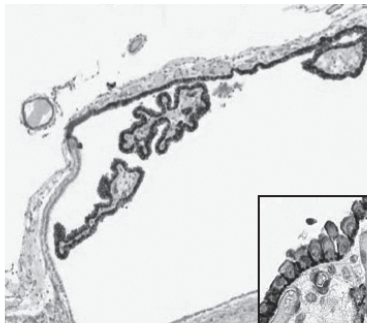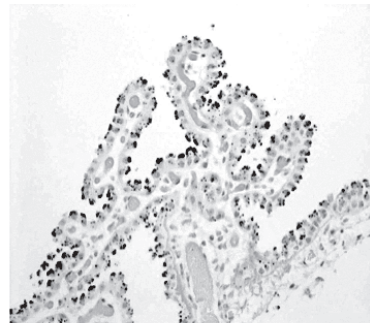

CDH6 IHC from TCR:  
Blood vessels in human  
cerebellum

CDH6 IHC from TCR:  
Blood vessels in  
human pancreas

CDH6 ISH:  
Blood vessels  
in human brain

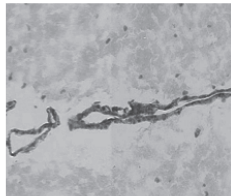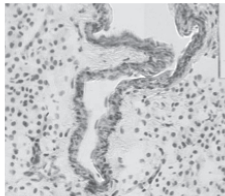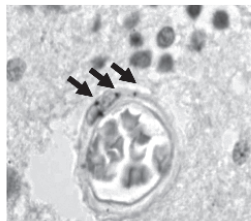

Atherosclerotic carotid artery  
IHC staining for CD68 and CDH6

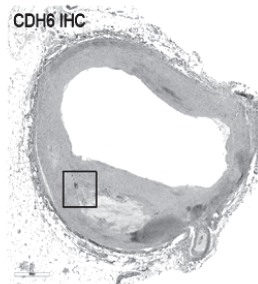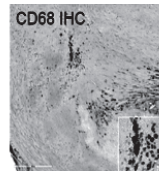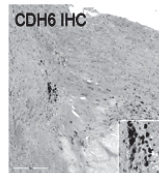

Supplement: Supplementary file 1 [file 29238606]
